# Supplementary material for: A fine-tunable white light source using a novel dual-excitation design and efficient Sn-doped condensed borate glass phosphor
Source: Royal Society of Chemistry journal article supplement (doi:10.1039/d4dt03224a), 2024-12-11
Supplement: d4dt03224a1.pdf [file d4dt03224a1.pdf]

## SUPPLEMENTARY INFORMATION

### Fine-tunable white light source using novel dual-excitation design and efficient Sn-doped condensed borate glass phosphor

*Bartosz Bondzior, Radosław Lisiecki*

Institute of Low Temperature and Structure Research, Polish Academy of Sciences, Okólna 2,  
50-422 Wrocław, Poland

Corresponding author: [b.bondzior@gmail.com](mailto:b.bondzior@gmail.com)

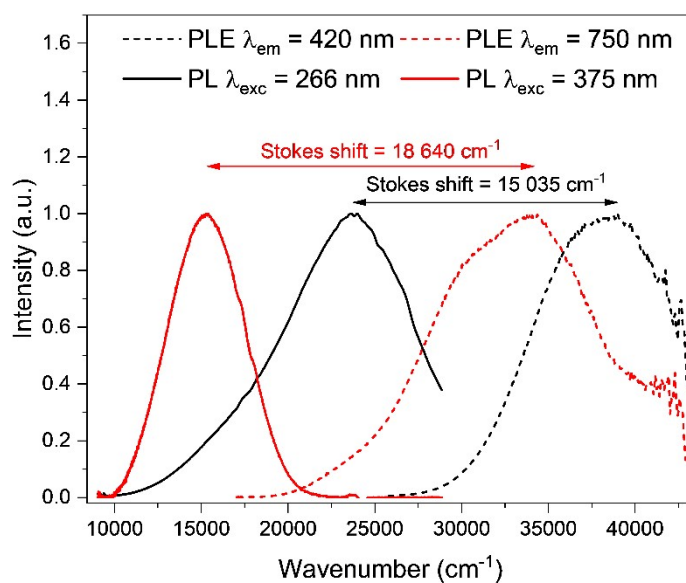

**Fig. S1** PL and PLE of LaMBO:Sn with Stokes shift values.

The activation energies were derived from equation (S1)<sup>1</sup> and its linear reformulation (S2).

$$I = \frac{I_0}{1 + e^{-\Delta E/kT}} \quad (\text{S1})$$

$$\ln\left(\frac{I}{I_0}\right) = -\Delta E \cdot \frac{1}{kT} \quad (\text{S2})$$

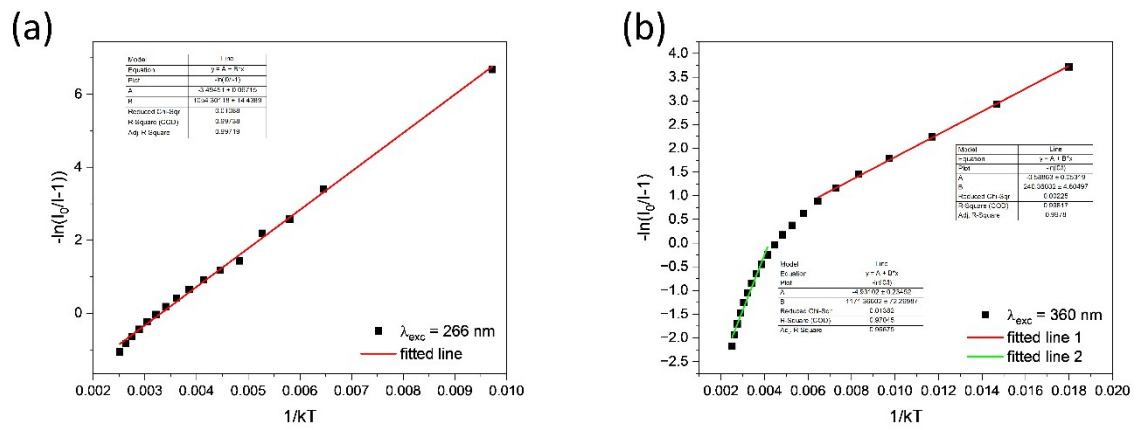

**Fig. S2** Fitting of the Arrhenius equation to the thermal quenching curve of LaMBO:Sn blue (a) and red emission (b).

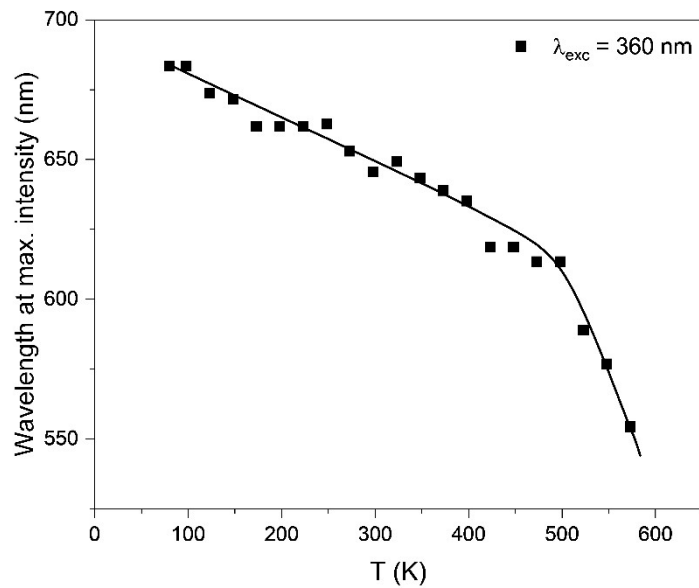

**Fig. S3** Red band position in the emission spectrum in the function of temperature.

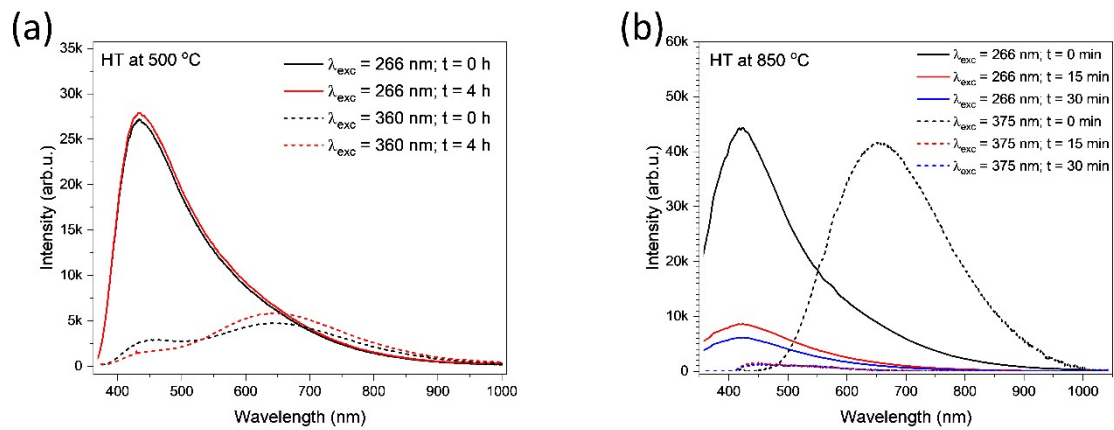

**Fig. S4** Emission spectra of the samples heat treated at 500 °C (a) and 850 °C (b).

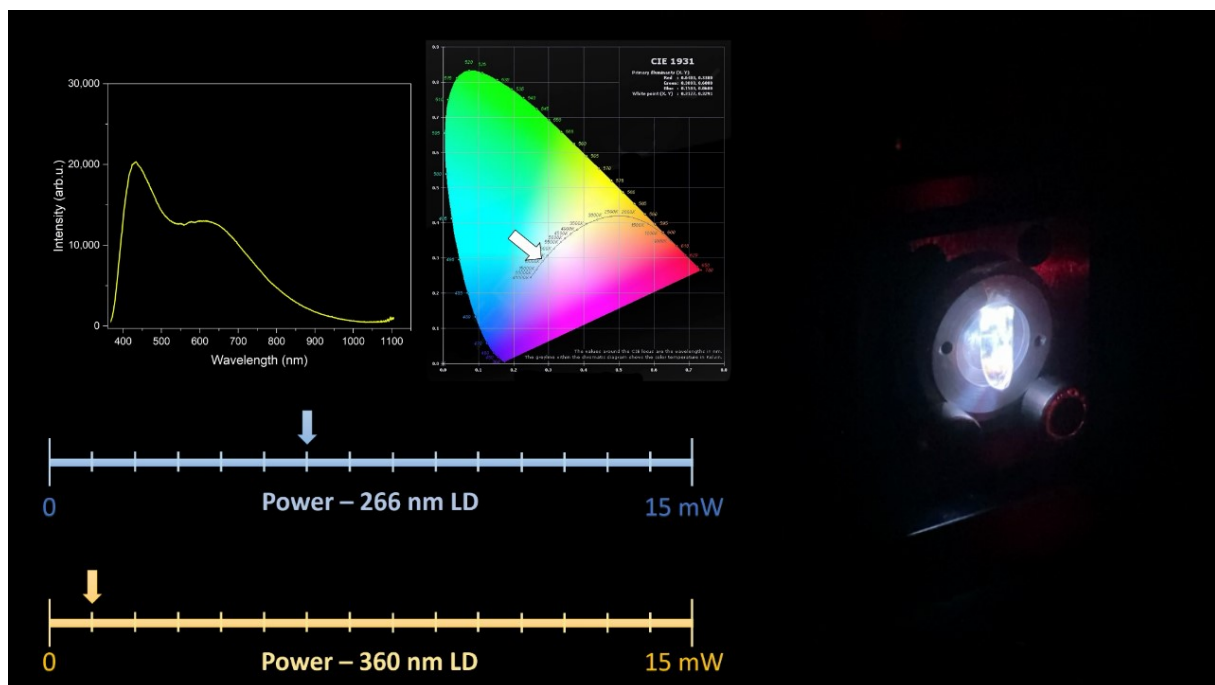

**Vid. S1** Continuous tunability of the dual-excited emission.

## References

- 1 P. Dorenbos, *Journal of Physics: Condensed Matter*, 2005, **17**, 8103–8111.
